# Supplementary material for: Computational selection and prioritization of candidate genes for Fetal Alcohol Syndrome
Source: Springer Nature journal article supplement (doi:10.1186/1471-2164-8-389), 2007-10-25
Supplement: Additional file 3 [file 1471-2164-8-389-s3.pdf]

**Table 1:** The promoter elements that have been found in the target promoter set relative to the background promoter set.

| Promoter Elements | ORI    | TAR (%) | BCG (%) | Probability of finding PE in target set | Probability of finding PE in background set | TAR (n) | BCG (n) | TAR Total | BCG Total | <i>P</i> -value |
|-------------------|--------|---------|---------|-----------------------------------------|---------------------------------------------|---------|---------|-----------|-----------|-----------------|
| +1 SRF            | 4.9832 | 6.99    | 3.41    | 0.00010                                 | 0.00004                                     | 38      | 350     | 544       | 10255     | 0.067           |
| -1 Nkx6-2         | 3.8034 | 7.17    | 3.6     | 0.00006                                 | 0.00003                                     | 39      | 369     | 544       | 10255     | 0.091           |
| -1 IPF1           | 3.3286 | 5.51    | 2.98    | 0.00005                                 | 0.00003                                     | 30      | 306     | 544       | 10255     | 1.000           |
| -1 SRF            | 3.1818 | 6.25    | 3.81    | 0.00009                                 | 0.00005                                     | 34      | 391     | 544       | 10255     | 1.000           |
| +1 TBX5           | 3.0911 | 7.9     | 4.45    | 0.00007                                 | 0.00004                                     | 43      | 456     | 544       | 10255     | 0.406           |
| +1 Pit-1          | 3.0386 | 5.33    | 3.15    | 0.00005                                 | 0.00003                                     | 29      | 323     | 544       | 10255     | 1.000           |
| +1 HSF1           | 2.7461 | 8.64    | 5.03    | 0.00007                                 | 0.00005                                     | 47      | 516     | 544       | 10255     | 0.448           |
| +1 HMG IY         | 2.7395 | 11.95   | 7.1     | 0.00010                                 | 0.00006                                     | 65      | 728     | 544       | 10255     | 0.060           |
| +1 IRF1           | 2.6653 | 12.68   | 7.93    | 0.00012                                 | 0.00007                                     | 69      | 813     | 544       | 10255     | 0.147           |
| +1 MEF-2          | 2.5417 | 7.9     | 5.02    | 0.00007                                 | 0.00004                                     | 43      | 515     | 544       | 10255     | 1.000           |
| -1 Hand1:E47      | 2.4874 | 5.7     | 3.62    | 0.00005                                 | 0.00003                                     | 31      | 371     | 544       | 10255     | 1.000           |
| +1 Cdx-2          | 2.3874 | 10.85   | 7.11    | 0.00010                                 | 0.00006                                     | 59      | 729     | 544       | 10255     | 1.000           |
| +1 C/EBPgamma     | 2.3669 | 7.9     | 5.03    | 0.00007                                 | 0.00004                                     | 43      | 516     | 544       | 10255     | 1.000           |
| -1 Sp3            | 2.2802 | 6.25    | 4.08    | 0.00005                                 | 0.00004                                     | 34      | 418     | 544       | 10255     | 1.000           |
| -1 Pbx-1          | 2.2091 | 15.07   | 10.13   | 0.00014                                 | 0.00009                                     | 82      | 1039    | 544       | 10255     | 0.315           |
| -1 DBP            | 2.1563 | 9.93    | 6.57    | 0.00008                                 | 0.00006                                     | 54      | 674     | 544       | 10255     | 1.000           |
| +1 C/EBPdelta     | 2.1086 | 5.15    | 3.52    | 0.00004                                 | 0.00003                                     | 28      | 361     | 544       | 10255     | 1.000           |
| +1 NF-AT          | 2.0871 | 5.7     | 4.16    | 0.00006                                 | 0.00004                                     | 31      | 427     | 544       | 10255     | 1.000           |
| -1 TBP            | 2.0639 | 9.38    | 6.49    | 0.00008                                 | 0.00006                                     | 51      | 666     | 544       | 10255     | 1.000           |

**Table 2:** Pairs of PE at maximum mutual distance of 50 nucleotides that have been found in the target promoter set relative to the background promoter set.

| Pairs of promoter elements | ORI     | TAR (%) | BCG (%) | Probability of finding PE in target set | Probability of finding PE in background set | TAR (n) | BCG (n) | TAR Total | BCG Total | P-value |
|----------------------------|---------|---------|---------|-----------------------------------------|---------------------------------------------|---------|---------|-----------|-----------|---------|
| -1 LBP-1/+1 AP-2           | 10.7173 | 5.15    | 1.64    | 0.00006                                 | 0.00002                                     | 28      | 168     | 544       | 10255     | 0.618   |
| +1 Pax-4/+1 FAC1           | 9.354   | 5.33    | 1.84    | 0.00006                                 | 0.00002                                     | 29      | 189     | 544       | 10255     | 1.000   |
| -1 Spz1/-1 ETF             | 8.8907  | 6.43    | 2.71    | 0.00014                                 | 0.00004                                     | 35      | 278     | 544       | 10255     | 1.000   |
| -1 MZF1/-1 VDR             | 8.3078  | 7.9     | 3.15    | 0.00017                                 | 0.00005                                     | 43      | 323     | 544       | 10255     | 0.194   |
| +1 FAC1/+1 Pax-4           | 7.8354  | 5.15    | 2.3     | 0.00010                                 | 0.00003                                     | 28      | 236     | 544       | 10255     | 1.000   |
| -1 MAZ/+1 ZF5              | 7.7859  | 6.25    | 2.04    | 0.00006                                 | 0.00002                                     | 34      | 209     | 544       | 10255     | 0.062   |
| +1 Pax-4/-1 MZF1           | 7.6641  | 5.51    | 2.4     | 0.00008                                 | 0.00003                                     | 30      | 246     | 544       | 10255     | 1.000   |
| -1 ZF5/-1 MAZ              | 7.2777  | 6.62    | 2.94    | 0.00011                                 | 0.00004                                     | 36      | 301     | 544       | 10255     | 1.000   |
| +1 ETF/-1 Sp1              | 6.6357  | 6.8     | 4.17    | 0.00037                                 | 0.00009                                     | 37      | 428     | 544       | 10255     | 1.000   |
| -1 ZF5/+1 C/EBP            | 6.2165  | 5.15    | 2.11    | 0.00006                                 | 0.00002                                     | 28      | 216     | 544       | 10255     | 1.000   |
| -1 MAZ/+1 AP-2             | 5.9377  | 5.7     | 2.38    | 0.00008                                 | 0.00003                                     | 31      | 244     | 544       | 10255     | 1.000   |
| +1 C/EBP/+1 Spz1           | 5.8262  | 6.07    | 2.44    | 0.00006                                 | 0.00003                                     | 33      | 250     | 544       | 10255     | 1.000   |
| +1 Sp1/-1 Spz1             | 5.7749  | 10.85   | 5.45    | 0.00030                                 | 0.00010                                     | 59      | 559     | 544       | 10255     | 1.000   |
| +1 ZF5/+1 MAZ              | 5.3521  | 6.8     | 2.78    | 0.00008                                 | 0.00004                                     | 37      | 285     | 544       | 10255     | 1.000   |
| +1 ZF5/-1 MAZ              | 5.171   | 5.33    | 2.15    | 0.00005                                 | 0.00003                                     | 29      | 220     | 544       | 10255     | 1.000   |
| -1 VDR/-1 MAZ              | 5.1338  | 6.8     | 3.17    | 0.00014                                 | 0.00006                                     | 37      | 325     | 544       | 10255     | 1.000   |
| +1 ZF5/-1 AP-2gamma        | 4.9973  | 5.33    | 2.33    | 0.00005                                 | 0.00002                                     | 29      | 239     | 544       | 10255     | 1.000   |
| +1 E2F/-1 VDR              | 4.9316  | 7.17    | 4.21    | 0.00015                                 | 0.00005                                     | 39      | 432     | 544       | 10255     | 1.000   |
| +1 Spz1/+1 Spz1            | 4.903   | 8.82    | 5.14    | 0.00021                                 | 0.00007                                     | 48      | 527     | 544       | 10255     | 1.000   |
| -1 Spz1/-1 MAZ             | 4.8704  | 5.7     | 2.72    | 0.00009                                 | 0.00004                                     | 31      | 279     | 544       | 10255     | 1.000   |
| +1 Pax-4/-1 Spz1           | 4.8571  | 9.93    | 4.85    | 0.00012                                 | 0.00005                                     | 54      | 497     | 544       | 10255     | 1.000   |
| -1 VDR/+1 VDR              | 4.8498  | 6.62    | 3.21    | 0.00009                                 | 0.00004                                     | 36      | 329     | 544       | 10255     | 1.000   |
| +1 Oct-1/+1 Pax-4          | 4.706   | 6.43    | 2.96    | 0.00008                                 | 0.00003                                     | 35      | 304     | 544       | 10255     | 1.000   |
| +1 Spz1/-1 Pax-4           | 4.6875  | 9.01    | 4.85    | 0.00012                                 | 0.00005                                     | 49      | 497     | 544       | 10255     | 1.000   |
| -1 ETF/+1 E2F              | 4.5575  | 6.8     | 3.66    | 0.00011                                 | 0.00005                                     | 37      | 375     | 544       | 10255     | 1.000   |
| -1 MAZ/-1 Spz1             | 4.5301  | 5.33    | 2.37    | 0.00007                                 | 0.00004                                     | 29      | 243     | 544       | 10255     | 1.000   |
| -1 Spz1/+1 VDR             | 4.5179  | 6.07    | 2.75    | 0.00007                                 | 0.00003                                     | 33      | 282     | 544       | 10255     | 1.000   |
| -1 MZF1/-1 ZF5             | 4.4631  | 5.7     | 2.79    | 0.00007                                 | 0.00003                                     | 31      | 286     | 544       | 10255     | 1.000   |
| -1 Spz1/+1 Pax-4           | 4.4298  | 9.01    | 4.85    | 0.00012                                 | 0.00005                                     | 49      | 497     | 544       | 10255     | 1.000   |
| +1 Spz1/+1 VDR             | 4.3932  | 11.76   | 6.92    | 0.00027                                 | 0.00010                                     | 64      | 710     | 544       | 10255     | 1.000   |
| +1 ETF/-1 ZF5              | 4.2011  | 9.93    | 6.5     | 0.00029                                 | 0.00011                                     | 54      | 667     | 544       | 10255     | 1.000   |
| -1 Oct-1/+1 Pax-4          | 4.1981  | 6.8     | 3.16    | 0.00007                                 | 0.00004                                     | 37      | 324     | 544       | 10255     | 1.000   |
| +1 ETF/+1 Sp1              | 4.1285  | 8.09    | 5.8     | 0.00061                                 | 0.00021                                     | 44      | 595     | 544       | 10255     | 1.000   |
| -1 VDR/+1 Pax-4            | 4.1164  | 10.29   | 5.88    | 0.00018                                 | 0.00008                                     | 56      | 603     | 544       | 10255     | 1.000   |
| -1 Pax-4/-1 Pax-2          | 4.0956  | 5.15    | 2.55    | 0.00005                                 | 0.00002                                     | 28      | 262     | 544       | 10255     | 1.000   |
| +1 AP-2/-1 ETF             | 4.0559  | 9.19    | 5.3     | 0.00023                                 | 0.00010                                     | 50      | 544     | 544       | 10255     | 1.000   |
| -1 C/EBP/-1 GEN_INI        | 4.0546  | 6.99    | 3.43    | 0.00014                                 | 0.00007                                     | 38      | 352     | 544       | 10255     | 1.000   |
| -1 Pax-4/-1 Oct-1          | 4.0195  | 6.07    | 3.11    | 0.00007                                 | 0.00004                                     | 33      | 319     | 544       | 10255     | 1.000   |
| -1 Tst-1/+1 Pax-4          | 4.0172  | 5.33    | 2.54    | 0.00005                                 | 0.00002                                     | 29      | 260     | 544       | 10255     | 1.000   |
| -1 ETF/+1 ZF5              | 3.8938  | 9.38    | 5.66    | 0.00018                                 | 0.00008                                     | 51      | 580     | 544       | 10255     | 1.000   |
| -1 ETF/-1 ZF5              | 3.7955  | 11.03   | 6.13    | 0.00022                                 | 0.00011                                     | 60      | 629     | 544       | 10255     | 1.000   |
| -1 C/EBP/-1 Pax-4          | 3.6539  | 9.38    | 4.84    | 0.00009                                 | 0.00005                                     | 51      | 496     | 544       | 10255     | 1.000   |
| +1 ETF/+1 AP-2             | 3.6306  | 9.19    | 6.51    | 0.00030                                 | 0.00011                                     | 50      | 668     | 544       | 10255     | 1.000   |
| +1 C/EBP/+1 GEN_INI        | 3.5705  | 7.54    | 3.92    | 0.00016                                 | 0.00009                                     | 41      | 402     | 544       | 10255     | 1.000   |
| -1 C/EBP/-1 Oct-1          | 3.5228  | 5.51    | 3.46    | 0.00009                                 | 0.00004                                     | 30      | 355     | 544       | 10255     | 1.000   |

|                     |        |       |       |         |         |    |      |     |       |       |
|---------------------|--------|-------|-------|---------|---------|----|------|-----|-------|-------|
| +1 ZF5/-1 ETF       | 3.4419 | 10.85 | 5.69  | 0.00016 | 0.00009 | 59 | 583  | 544 | 10255 | 1.000 |
| -1 Spz1/-1 AP-2     | 3.4355 | 8.27  | 5.38  | 0.00017 | 0.00008 | 45 | 552  | 544 | 10255 | 1.000 |
| -1 VDR/-1 MZF1      | 3.4345 | 5.88  | 3.22  | 0.00009 | 0.00005 | 32 | 330  | 544 | 10255 | 1.000 |
| -1 VDR/-1 VDR       | 3.2937 | 15.07 | 8.08  | 0.00028 | 0.00016 | 82 | 829  | 544 | 10255 | 0.130 |
| +1 ETF/+1 ETF       | 3.2705 | 10.85 | 8.06  | 0.00062 | 0.00025 | 59 | 827  | 544 | 10255 | 1.000 |
| -1 E2F/-1 ETF       | 3.2424 | 7.72  | 5.54  | 0.00022 | 0.00009 | 42 | 568  | 544 | 10255 | 1.000 |
| +1 ZF5/-1 VDR       | 3.2332 | 9.93  | 6.35  | 0.00017 | 0.00008 | 54 | 651  | 544 | 10255 | 1.000 |
| +1 VDR/+1 MAZ       | 3.2282 | 6.43  | 2.83  | 0.00006 | 0.00005 | 35 | 290  | 544 | 10255 | 1.000 |
| -1 VDR/-1 E2F       | 3.211  | 9.38  | 6.46  | 0.00021 | 0.00009 | 51 | 662  | 544 | 10255 | 1.000 |
| -1 MAZ/-1 MAZ       | 3.1829 | 5.15  | 1.49  | 0.00006 | 0.00006 | 28 | 153  | 544 | 10255 | 0.113 |
| -1 MZF1/+1 Sp1      | 3.0484 | 5.7   | 2.37  | 0.00006 | 0.00005 | 31 | 243  | 544 | 10255 | 1.000 |
| +1 Sp1/-1 VDR       | 3.0235 | 11.76 | 7.01  | 0.00028 | 0.00016 | 64 | 719  | 544 | 10255 | 1.000 |
| -1 Oct-1/-1 Pax-4   | 3.0033 | 6.07  | 3.43  | 0.00007 | 0.00004 | 33 | 352  | 544 | 10255 | 1.000 |
| +1 AP-2/+1 GEN_INI  | 2.9689 | 6.62  | 3.68  | 0.00015 | 0.00009 | 36 | 377  | 544 | 10255 | 1.000 |
| -1 ZF5/+1 ETF       | 2.9515 | 9.56  | 7.01  | 0.00024 | 0.00011 | 52 | 719  | 544 | 10255 | 1.000 |
| -1 ZF5/-1 ETF       | 2.916  | 12.5  | 7.22  | 0.00022 | 0.00013 | 68 | 740  | 544 | 10255 | 1.000 |
| -1 Spz1/+1 Sp1      | 2.8755 | 10.48 | 6.07  | 0.00019 | 0.00011 | 57 | 622  | 544 | 10255 | 1.000 |
| +1 Sp1/-1 MAZ       | 2.8744 | 5.7   | 2.76  | 0.00009 | 0.00006 | 31 | 283  | 544 | 10255 | 1.000 |
| -1 E2F/+1 ETF       | 2.8346 | 5.15  | 4.59  | 0.00016 | 0.00006 | 28 | 471  | 544 | 10255 | 1.000 |
| -1 Sp1/-1 MAZ       | 2.827  | 5.88  | 2.94  | 0.00013 | 0.00010 | 32 | 301  | 544 | 10255 | 1.000 |
| -1 VDR/+1 E2F       | 2.7991 | 8.09  | 4.87  | 0.00011 | 0.00007 | 44 | 499  | 544 | 10255 | 1.000 |
| -1 Spz1/-1 Sp1      | 2.7847 | 12.32 | 6.63  | 0.00031 | 0.00021 | 67 | 680  | 544 | 10255 | 1.000 |
| -1 C/EBP/+1 Oct-1   | 2.7834 | 6.07  | 3.59  | 0.00008 | 0.00005 | 33 | 368  | 544 | 10255 | 1.000 |
| -1 Spz1/-1 E2F      | 2.7777 | 8.46  | 5.56  | 0.00012 | 0.00006 | 46 | 570  | 544 | 10255 | 1.000 |
| -1 MAZ/-1 Sp1       | 2.7765 | 5.51  | 2.96  | 0.00014 | 0.00009 | 30 | 304  | 544 | 10255 | 1.000 |
| -1 Pax-4/+1 Oct-1   | 2.7422 | 5.33  | 3.25  | 0.00006 | 0.00004 | 29 | 333  | 544 | 10255 | 1.000 |
| -1 E2F-1/-1 Pax-4   | 2.7262 | 6.8   | 4.85  | 0.00011 | 0.00006 | 37 | 497  | 544 | 10255 | 1.000 |
| -1 ZF5/-1 VDR       | 2.7201 | 13.42 | 8.45  | 0.00022 | 0.00013 | 73 | 867  | 544 | 10255 | 1.000 |
| -1 Spz1/+1 ZF5      | 2.7194 | 9.38  | 5.53  | 0.00010 | 0.00006 | 51 | 567  | 544 | 10255 | 1.000 |
| -1 VDR/+1 AP-2      | 2.7174 | 12.13 | 7.86  | 0.00023 | 0.00013 | 66 | 806  | 544 | 10255 | 1.000 |
| -1 Spz1/+1 AP-2     | 2.6995 | 8.27  | 6.1   | 0.00017 | 0.00008 | 45 | 626  | 544 | 10255 | 1.000 |
| +1 VDR/-1 E2F-1     | 2.636  | 5.33  | 3.97  | 0.00011 | 0.00006 | 29 | 407  | 544 | 10255 | 1.000 |
| -1 Pax-4/+1 GEN_INI | 2.6326 | 8.82  | 4.98  | 0.00016 | 0.00011 | 48 | 511  | 544 | 10255 | 1.000 |
| +1 E2F/+1 ETF       | 2.6312 | 11.4  | 7.67  | 0.00023 | 0.00013 | 62 | 787  | 544 | 10255 | 1.000 |
| +1 VDR/-1 AP-2      | 2.5728 | 10.48 | 7.78  | 0.00023 | 0.00012 | 57 | 798  | 544 | 10255 | 1.000 |
| +1 C/EBP/-1 C/EBP   | 2.5384 | 8.09  | 5.33  | 0.00011 | 0.00006 | 44 | 547  | 544 | 10255 | 1.000 |
| +1 ETF/+1 E2F       | 2.4797 | 9.19  | 7.35  | 0.00024 | 0.00012 | 50 | 754  | 544 | 10255 | 1.000 |
| -1 Pax-4/+1 Spz1    | 2.4614 | 7.35  | 5.84  | 0.00012 | 0.00006 | 40 | 599  | 544 | 10255 | 1.000 |
| +1 CDX/+1 CDX       | 2.433  | 5.15  | 2.08  | 0.00005 | 0.00005 | 28 | 213  | 544 | 10255 | 1.000 |
| -1 Pax-4/+1 VDR     | 2.4297 | 8.64  | 6.38  | 0.00014 | 0.00008 | 47 | 654  | 544 | 10255 | 1.000 |
| +1 GC box/+1 Spz1   | 2.397  | 5.33  | 3.68  | 0.00007 | 0.00004 | 29 | 377  | 544 | 10255 | 1.000 |
| +1 C/EBP/+1 C/EBP   | 2.3729 | 7.54  | 4.87  | 0.00009 | 0.00006 | 41 | 499  | 544 | 10255 | 1.000 |
| -1 ETF/-1 ETF       | 2.3364 | 6.62  | 5.26  | 0.00036 | 0.00019 | 36 | 539  | 544 | 10255 | 1.000 |
| -1 AP-2/-1 Pax-4    | 2.3118 | 8.82  | 6.24  | 0.00013 | 0.00008 | 48 | 640  | 544 | 10255 | 1.000 |
| -1 Pax-4/-1 ZF5     | 2.3093 | 9.38  | 6.32  | 0.00011 | 0.00007 | 51 | 648  | 544 | 10255 | 1.000 |
| +1 ZF5/+1 Spz1      | 2.3087 | 10.48 | 7.54  | 0.00015 | 0.00009 | 57 | 773  | 544 | 10255 | 1.000 |
| -1 AP-2/+1 AP-2     | 2.2735 | 17.1  | 12.66 | 0.00043 | 0.00026 | 93 | 1298 | 544 | 10255 | 1.000 |
| -1 E2F-1/+1 Sp1     | 2.2487 | 8.09  | 5.81  | 0.00030 | 0.00019 | 44 | 596  | 544 | 10255 | 1.000 |
| +1 C/EBP/-1 Pax-4   | 2.2468 | 8.09  | 5.1   | 0.00008 | 0.00005 | 44 | 523  | 544 | 10255 | 1.000 |
| -1 C/EBP/-1 C/EBP   | 2.2411 | 7.54  | 4.79  | 0.00008 | 0.00006 | 41 | 491  | 544 | 10255 | 1.000 |

|                    |        |       |       |         |         |     |      |     |       |       |
|--------------------|--------|-------|-------|---------|---------|-----|------|-----|-------|-------|
| -1 E2F/+1 AP-2     | 2.2048 | 13.6  | 9.97  | 0.00028 | 0.00017 | 74  | 1022 | 544 | 10255 | 1.000 |
| +1 E2F/-1 ETF      | 2.1983 | 5.51  | 3.8   | 0.00007 | 0.00005 | 30  | 390  | 544 | 10255 | 1.000 |
| +1 AP-2/+1 AP-2    | 2.1656 | 15.99 | 12.96 | 0.00048 | 0.00027 | 87  | 1329 | 544 | 10255 | 1.000 |
| -1 AP-2/-1 AP-2    | 2.1535 | 14.52 | 12.75 | 0.00055 | 0.00029 | 79  | 1308 | 544 | 10255 | 1.000 |
| +1 ZF5/+1 ETF      | 2.1293 | 12.32 | 9.63  | 0.00029 | 0.00018 | 67  | 988  | 544 | 10255 | 1.000 |
| +1 AP-2/+1 E2F     | 2.1068 | 15.62 | 11.86 | 0.00028 | 0.00018 | 85  | 1216 | 544 | 10255 | 1.000 |
| +1 E2F/-1 GC box   | 2.0944 | 5.51  | 3.52  | 0.00006 | 0.00005 | 30  | 361  | 544 | 10255 | 1.000 |
| -1 Pax-4/-1 C/EBP  | 2.0906 | 7.9   | 5.62  | 0.00009 | 0.00006 | 43  | 576  | 544 | 10255 | 1.000 |
| +1 ETF/+1 ZF5      | 2.0791 | 8.46  | 9.01  | 0.00033 | 0.00015 | 46  | 924  | 544 | 10255 | 1.000 |
| +1 AP-2/+1 ZF5     | 2.0762 | 20.22 | 15.76 | 0.00045 | 0.00028 | 110 | 1616 | 544 | 10255 | 1.000 |
| -1 ZF5/-1 Spz1     | 2.0761 | 7.54  | 6.39  | 0.00014 | 0.00008 | 41  | 655  | 544 | 10255 | 1.000 |
| +1 Pax-4/-1 C/EBP  | 2.071  | 8.27  | 5.61  | 0.00009 | 0.00006 | 45  | 575  | 544 | 10255 | 1.000 |
| -1 ZF5/+1 AP-2     | 2.0443 | 17.1  | 14.69 | 0.00048 | 0.00027 | 93  | 1506 | 544 | 10255 | 1.000 |
| -1 Spz1/+1 GEN_INI | 2.0393 | 5.7   | 3.77  | 0.00011 | 0.00008 | 31  | 387  | 544 | 10255 | 1.000 |
| +1 VDR/+1 AP-2     | 2.0253 | 9.93  | 7.66  | 0.00017 | 0.00011 | 54  | 786  | 544 | 10255 | 1.000 |
| +1 ETF/-1 AP-2     | 2.0252 | 8.46  | 7.29  | 0.00024 | 0.00014 | 46  | 748  | 544 | 10255 | 1.000 |
| +1 AP-2/-1 AP-2    | 2.0129 | 17.1  | 13.32 | 0.00040 | 0.00025 | 93  | 1366 | 544 | 10255 | 1.000 |
| +1 ZF5/-1 Pax-4    | 2.0116 | 10.48 | 8.16  | 0.00015 | 0.00010 | 57  | 837  | 544 | 10255 | 1.000 |
| +1 VDR/+1 Spz1     | 2.0033 | 7.9   | 7.03  | 0.00019 | 0.00011 | 43  | 721  | 544 | 10255 | 1.000 |
| +1 Pax-4/+1 VDR    | 2.0013 | 6.07  | 4.71  | 0.00008 | 0.00005 | 33  | 483  | 544 | 10255 | 1.000 |
